# Supplementary material
Source: MDPI journal article supplement (https://www.mdpi.com/2227-9717/10/3/543)
Supplement: s1 [file s1]

## Supplementary data

# Pyrolysis and volatile evolution behaviors of cold-rolling oily sludge

Zhigang Que <sup>1\*</sup>, Yinxuan Fu <sup>1</sup>, Jinming Shi<sup>1</sup>, Xianbin Ai<sup>1</sup> and Chunbao (Charles) Xu<sup>2\*</sup>

<sup>1</sup> Institute of Energy Research, Jiangxi Academy of Science, Nanchang 330096, Jiangxi, China; quezhigang@126.com(Z. Q.); fuyinxuan\_2007@163.com(Y.F.); shijinming0012@163.com(J.S.); axbustb@sina.com(X.A.);

<sup>2</sup> Department of Chemical and Biochemical Engineering, Western University, London N6A5B9, Canada; cxu6@uwo.ca (C.X.)

\* Correspondence: quezhigang@126.com (Z.Q.), cxu6@uwo.ca (C.X.); Tel.: +86079188171689(Z.Q.)

Table S1 Compents of the volatile products from cold-rolling oil sludge pyrolysis by GC/MS at 393–844 K and 844–1173 K.

| Name of compounds                | RT<br>/min | Area /% |        |
|----------------------------------|------------|---------|--------|
|                                  |            | 339–    | 844–   |
|                                  |            | 844 K   | 1173 K |
| Aliphatic hydrocarbons           |            |         |        |
| Propene                          | 1.773      | ---     | 0.148  |
| Propene                          | 2.064      | ---     | 26.206 |
| Propene                          | 2.108      | 1.132   | ---    |
| Butane                           | 2.173      | ---     | 6.659  |
| Cyclobutene                      | 2.180      | ---     | 5.385  |
| 2-Butene, (E)-                   | 2.209      | 1.778   | ---    |
| 2-Butyne                         | 2.217      | 0.586   | ---    |
| 2-Pentene, (E)-                  | 2.410      | 1.977   | ---    |
| Pentane                          | 2.415      | ---     | 2.351  |
| Cyclopropane, 1,1'-methylenebis- | 2.473      | 0.218   | ---    |
| 1,4-Pentadiene                   | 2.523      | ---     | 1.085  |
| 1,3-Pentadiene                   | 2.549      | 0.246   | ---    |
| Cyclopentene                     | 2.575      | ---     | 0.760  |
| 1,3-Cyclopentadiene              | 2.603      | 0.484   | ---    |
| Cyclopentene                     | 2.660      | ---     | 0.163  |
| Cyclopentene                     | 2.686      | 0.437   | ---    |
| 1-Hexene                         | 2.737      | 0.124   | ---    |
| 1,5-Hexadiene                    | 2.816      | 0.163   | ---    |
| Cyclopropane, propyl-            | 2.856      | ---     | 0.315  |
| 1-Hexene                         | 2.884      | 2.031   | ---    |
| n-Hexane                         | 2.912      | ---     | 0.966  |
| n-Hexane                         | 2.940      | 0.608   | ---    |
| 1-Pentene, 3-methyl-             | 2.993      | 0.118   | ---    |
| Cyclobutene, 3,3-dimethyl-       | 3.062      | 0.139   | ---    |
| 1,3-Cyclopentadiene, 1-methyl-   | 3.352      | 0.115   | ---    |
| Cyclopentene, 3-methyl-          | 3.394      | ---     | 0.140  |
| Cyclopentene, 3-methyl-          | 3.428      | 0.164   | ---    |
| 1,4-Cyclohexadiene               | 3.615      | ---     | 0.254  |
| Cyclobutane, 1,2-bis(methylene)- | 3.639      | 0.773   | ---    |
| Cyclohexene                      | 3.784      | 0.249   | ---    |
| Butane, 2-cyclopropyl-           | 3.851      | ---     | 0.229  |
| 1-Heptene                        | 3.892      | 1.630   | ---    |
| Heptane                          | 3.970      | ---     | 0.628  |
| Heptane                          | 4.010      | 0.681   | ---    |
| 2-Heptene, (E)-                  | 4.116      | 0.109   | ---    |
| 1-Pentene, 2,4,4-trimethyl-      | 4.222      | 0.217   | ---    |
| 1,4-Heptadiene                   | 4.399      | 0.105   | ---    |
| Cyclohexene, 1-methyl-           | 5.327      | 0.119   | ---    |

|                                            |        |               |               |
|--------------------------------------------|--------|---------------|---------------|
| Isopropylcyclobutane                       | 5.723  | ---           | 0.105         |
| 1-Octene                                   | 5.770  | 1.655         | ---           |
| Octane                                     | 5.933  | ---           | 0.433         |
| Octane                                     | 5.980  | 0.848         | ---           |
| 1,3-Octadiene                              | 6.662  | 0.142         | ---           |
| 1-Nonene                                   | 8.668  | 1.182         | ---           |
| Nonane                                     | 8.950  | 0.503         | ---           |
| Bicyclo[2.2.2]octane                       | 9.050  | 0.131         | ---           |
| 1-Decene                                   | 12.257 | 1.385         | ---           |
| Decane                                     | 12.579 | 0.392         | ---           |
| Cyclopropane, octyl-                       | 16.116 | 1.545         | ---           |
| Undecane                                   | 16.446 | 0.538         | ---           |
| 2-Undecene, (E)-                           | 16.628 | 0.277         | ---           |
| 1,4-Undecadiene, (E)-                      | 17.429 | 0.233         | ---           |
| Azulene                                    | 19.784 | ---           | 3.953         |
| 1-Dodecene                                 | 19.972 | 1.642         | ---           |
| Dodecane                                   | 20.296 | 0.480         | ---           |
| Cyclododecene                              | 21.252 | 0.228         | ---           |
| Tricyclo[3.2.1.0(2,4)]octane, 3-methylene- | 22.550 | 0.165         | ---           |
| 1-Tridecene                                | 23.716 | 1.352         | ---           |
| Tridecane                                  | 24.006 | 0.671         | ---           |
| 1-Tetradecene                              | 27.252 | 1.901         | ---           |
| Tetradecane                                | 27.514 | 0.618         | ---           |
| Cyclopropane, 1-(1-methylethyl)-2-nonyl-   | 30.379 | 0.151         | ---           |
| 1-Pentadecene                              | 30.592 | 1.739         | ---           |
| Pentadecane                                | 30.842 | 1.378         | ---           |
| 1-Pentadecene                              | 30.962 | 0.111         | ---           |
| Cyclohexene, 1-nonyl-                      | 31.687 | 0.165         | ---           |
| cis,cis-5,9-Tetradecadiene                 | 33.262 | 0.118         | ---           |
| 7-Hexadecene, (Z)-                         | 33.495 | 0.147         | ---           |
| Cetene                                     | 33.737 | 0.504         | ---           |
| Hexadecane                                 | 33.961 | 0.222         | ---           |
| Cyclododecene, (Z)-                        | 36.067 | 0.189         | ---           |
| Bicyclo[3.2.1]octane                       | 36.250 | 0.117         | ---           |
| Cyclopentane, (2-methylbutyl)-             | 36.443 | 0.169         | ---           |
| 1-Heptadecene                              | 36.735 | 0.367         | ---           |
| Undecane, 4,7-dimethyl-                    | 36.935 | 0.269         | ---           |
| Heptadecane                                | 36.941 | 0.260         | ---           |
| Cetene                                     | 39.571 | 0.143         | ---           |
| 1,6-Octadiene, 5,7-dimethyl-, (R)-         | 49.762 | 0.396         | ---           |
| Heptadecane, 4-propyl-                     | 55.524 | 0.599         | ---           |
| <b>Sub Total</b>                           |        | <b>37.133</b> | <b>49.780</b> |
| <b>Aliphatic hydrocarbons</b>              |        |               |               |
| Benzene                                    | 3.550  | 0.766         | ---           |

|                                                                                                                                |        |               |               |
|--------------------------------------------------------------------------------------------------------------------------------|--------|---------------|---------------|
| Toluene                                                                                                                        | 5.262  | 0.589         | ---           |
| Ethylbenzene                                                                                                                   | 7.718  | 0.143         | ---           |
| Styrene                                                                                                                        | 8.707  | 0.198         | ---           |
| Benzene, propyl-                                                                                                               | 10.855 | 0.100         | ---           |
| Indene                                                                                                                         | 14.307 | 0.131         | ---           |
| Benzene, pentyl-                                                                                                               | 18.655 | 0.101         | ---           |
| Indene                                                                                                                         | 19.813 | 0.128         | ---           |
| Benzene, heptyl-                                                                                                               | 26.274 | 0.143         | ---           |
| Benzene, octyl-                                                                                                                | 29.784 | 0.138         | ---           |
| Benzene, decyl-                                                                                                                | 36.273 | 0.475         | ---           |
| Benzene                                                                                                                        | 3.515  | ---           | 15.965        |
| Toluene                                                                                                                        | 5.214  | ---           | 13.365        |
| Ethylbenzene                                                                                                                   | 7.680  | ---           | 0.455         |
| Ethylbenzene                                                                                                                   | 7.956  | ---           | 2.279         |
| Styrene                                                                                                                        | 8.660  | ---           | 1.698         |
| Benzene, 1,2,3-trimethyl-                                                                                                      | 12.332 | ---           | 0.298         |
| Indane                                                                                                                         | 12.373 | ---           | 0.566         |
| Indane                                                                                                                         | 23.928 | ---           | 0.771         |
| Benzene, 1,2,3-trimethyl-                                                                                                      | 24.481 | ---           | 0.632         |
| Ethylbenzene                                                                                                                   | 26.870 | ---           | 0.564         |
| <b>Sub Total</b>                                                                                                               |        | <b>2.912</b>  | <b>36.594</b> |
| <b>Fatty acids</b>                                                                                                             |        |               |               |
| Propanoic acid, anhydride                                                                                                      | 2.704  | 0.390         | ---           |
| 3,4,5,6-Tetrahydrophthalic anhydride                                                                                           | 15.476 | 0.262         | ---           |
| Nonanoic acid                                                                                                                  | 23.043 | 0.106         | ---           |
| Dodecanoic acid                                                                                                                | 33.137 | 2.122         | ---           |
| Tetradecanoic acid                                                                                                             | 38.788 | 0.714         | ---           |
| n-Hexadecanoic acid                                                                                                            | 45.603 | 8.091         | ---           |
| <b>Sub Total</b>                                                                                                               |        | <b>11.684</b> | <b>0</b>      |
| <b>Esters</b>                                                                                                                  |        |               |               |
| Butyric acid, neopentyl ester                                                                                                  | 5.922  | 0.122         | ---           |
| Dodecanoic acid, ethenyl ester                                                                                                 | 41.305 | 0.213         | ---           |
| Carbonic acid, prop-1-en-2-yl tetradecyl ester                                                                                 | 41.659 | 0.117         | ---           |
| 1-Naphthoic acid, 2-dimethylaminoethyl ester                                                                                   | 41.894 | 0.128         | ---           |
| Allyl heptanoate                                                                                                               | 41.952 | 0.222         | ---           |
| Octadecanoic acid, 2-propenyl ester                                                                                            | 49.497 | 4.474         | ---           |
| Acetic acid,<br>(dodecahydro-7-hydroxy-1,4b,8,8-tetramethyl-10-oxo-2(1H)-<br>phenanthrenylidene)-,2-(dimethylamino)ethyl ester | 49.742 | 0.104         | ---           |
| Pivalic acid vinyl ester                                                                                                       | 49.754 | 0.136         | ---           |
| Dodecanoic acid, ethenyl ester                                                                                                 | 51.946 | 0.294         | ---           |
| i-Propyl 9-octadecenoate                                                                                                       | 55.537 | 0.636         | ---           |
| Palmitic acid vinyl ester                                                                                                      | 55.758 | 0.522         | ---           |
| Octadecanoic acid, 2-propenyl ester                                                                                            | 56.442 | 0.274         | ---           |

|                                             |        |               |              |
|---------------------------------------------|--------|---------------|--------------|
| Phosphonic acid, ethyl hexyl ester          | 59.504 | 0.104         | ---          |
| <b>Sub Total</b>                            |        | <b>7.346</b>  | <b>0</b>     |
| <b>Ketones</b>                              |        |               |              |
| 2-Butanone                                  | 2.435  | 0.634         | ---          |
| 2(5H)-Furanone                              | 5.802  | 0.368         | ---          |
| 2-Cyclopenten-1-one                         | 6.885  | 0.123         | ---          |
| 4,6-Octadiyn-3-one, 2-methyl-               | 8.686  | ---           | 1.114        |
| Cyclohexanone                               | 8.846  | 1.380         | ---          |
| 1-Hexanone, 5-methyl-1-phenyl-              | 11.085 | ---           | 0.097        |
| 2-Octanone                                  | 12.192 | 0.100         | ---          |
| Cycloheptanone                              | 13.179 | 1.615         | ---          |
| Acetophenone                                | 15.138 | 0.117         | ---          |
| 4-Cyclopentene-1,2,3-trione, 4,5-dihydroxy- | 16.091 | 0.113         | ---          |
| Cyclooctanone                               | 17.297 | 0.473         | ---          |
| 2-Tridecanone                               | 30.666 | 0.361         | ---          |
| 1-Decen-3-one                               | 33.488 | 0.123         | ---          |
| 5-Hexadecanone                              | 36.211 | 0.188         | ---          |
| 2-Pentadecanone                             | 36.875 | 0.345         | ---          |
| 2-Heptadecanone                             | 42.861 | 3.250         | ---          |
| 1-Decen-3-one                               | 46.255 | 0.201         | ---          |
| 3-Octadecanone                              | 46.435 | 0.273         | ---          |
| 2-Nonadecanone                              | 50.494 | 0.629         | ---          |
| 2-Hexanone                                  | 53.252 | 0.131         | ---          |
| 1-Hexadecanone, 1-cyclopentyl-              | 56.220 | 0.136         | ---          |
| 6-Undecanone                                | 56.568 | 0.447         | ---          |
| 7-Tridecanone                               | 59.701 | 0.318         | ---          |
| <b>Sub Total</b>                            |        | <b>11.327</b> | <b>1.211</b> |
| <b>Aldehydes</b>                            |        |               |              |
| Formaldehyde                                | 2.019  | ---           | 2.123        |
| Benzaldehyde                                | 11.194 | 0.109         | ---          |
| Octanal                                     | 12.716 | 0.198         | ---          |
| Decanal                                     | 20.516 | 0.151         | ---          |
| Dodecanal                                   | 27.835 | 0.480         | ---          |
| Tetradecanal                                | 34.376 | 0.112         | ---          |
| <b>Sub Total</b>                            |        | <b>1.050</b>  | <b>2.123</b> |
| <b>Nitrogen compounds</b>                   |        |               |              |
| (2-Aziridinylethyl)amine                    | 0.425  | 0.304         | ---          |
| (2-Aziridinylethyl)amine                    | 0.566  | 0.349         | ---          |
| (2-Aziridinylethyl)amine                    | 0.628  | 0.327         | ---          |
| (2-Aziridinylethyl)amine                    | 0.721  | 0.608         | ---          |
| (2-Aziridinylethyl)amine                    | 0.758  | 0.469         | ---          |
| 2-Propanamine                               | 0.812  | 0.342         | ---          |
| (2-Aziridinylethyl)amine                    | 0.979  | 0.232         | ---          |
| (2-Aziridinylethyl)amine                    | 0.985  | 0.228         | ---          |

|                                                                    |        |               |               |
|--------------------------------------------------------------------|--------|---------------|---------------|
| 1,2-Ethanediamine, N,N'-dimethyl-                                  | 1.02   | 0.159         | ---           |
| Nitrous oxide                                                      | 1.067  | 0.185         | ---           |
| 2-Propanamine                                                      | 1.215  | 0.112         | ---           |
| (2-Aziridinylethyl)amine                                           | 1.582  | ---           | 1.837         |
| (2-Aziridinylethyl)amine                                           | 1.691  | ---           | 2.625         |
| Epinephrine                                                        | 2.067  | 2.389         | ---           |
| Nitrous oxide                                                      | 2.282  | 0.149         | ---           |
| 1,2,4,5-Tetrazine, 3,6-dipropyl-                                   | 2.298  | 0.151         | ---           |
| Fumaronitrile                                                      | 3.288  | ---           | 0.311         |
| Benzonitrile                                                       | 11.972 | ---           | 0.657         |
| Ethylamine,                                                        | 19.965 | 0.186         | ---           |
| 2-((p-bromo-.alpha.-methyl-.alpha.-phenylbenzyl)oxy)-N,N-dimethyl- |        |               |               |
| Ethylamine,                                                        | 23.726 | 0.126         | ---           |
| 2-((p-bromo-.alpha.-methyl-.alpha.-phenylbenzyl)oxy)-N,N-dimethyl- |        |               |               |
| 4-Piperidinone, 2,2,6,6-tetramethyl-1-nitroso-                     | 23.997 | 0.114         | ---           |
| Undecanenitrile                                                    | 30.458 | 0.195         | ---           |
| 2,5-Piperazinedione, 3-(phenylmethyl)-                             | 33.122 | 0.241         | ---           |
| Gephyrotoxin 195b'                                                 | 42.812 | 0.440         | ---           |
| 5-Hexynoic acid, 2-amino-4-methyl-                                 | 42.84  | 0.171         | ---           |
| Benzamide,                                                         | 43.862 | 0.100         | ---           |
| N-[2-(4,5-dihydro-3-phenyl-1H-pyrazol-1-yl)-2-phenylethyl]-        |        |               |               |
| 2-Ethyl-5-undecyl-.delta.1--pyrroline                              | 50.507 | 0.204         | ---           |
| Dodecanamide                                                       | 53.107 | 0.970         | ---           |
| Butan-2-one, 4-[pyrrolidin-2-one-5-yl]-                            | 59.516 | 0.276         | ---           |
| <b>Sub Total</b>                                                   |        | <b>9.028</b>  | <b>5.431</b>  |
| <b>Unresolved Area</b>                                             |        | <b>19.520</b> | <b>4.861</b>  |
| <b>Total Area</b>                                                  |        | <b>100.00</b> | <b>100.00</b> |
